# Supplementary material for: Adsorption and release of biocides with mesoporous silica nanoparticles
Source: Royal Society of Chemistry journal article supplement (doi:10.1039/c2nr11691j), 2011-12-07
Supplement: c2nr11691j.pdf [file c2nr11691j.pdf]

## Supporting Information

### Adsorption and release of biocides with mesoporous silica nanoparticles

Amirali Papat<sup>1</sup>, Jian Liu<sup>1</sup>, Qihong Hu<sup>1</sup>, Michael Kennedy<sup>2</sup>, Brenton Peters<sup>2</sup>, Gao Qing (Max) Lu<sup>1</sup>,  
5 Shi Zhang Qiao\*<sup>1</sup>

<sup>1</sup>Australian Institute for Bioengineering and Nanotechnology, The University of Queensland, QLD 4072 Australia; Email: [s.qiao@uq.edu.au](mailto:s.qiao@uq.edu.au)

<sup>2</sup>Department of Employment, Economic Development and Innovation, Dutton Park, QLD 4102 Australia

10

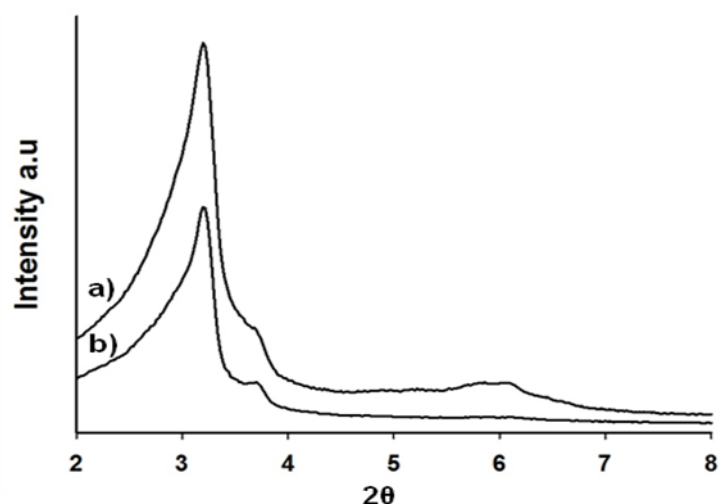

**Fig.S1** XRD patterns of a) calcined MCM-48 and b) imidacloprid loaded MCM-48; showing that imidacloprid loaded particles retains 3D cubic structure.

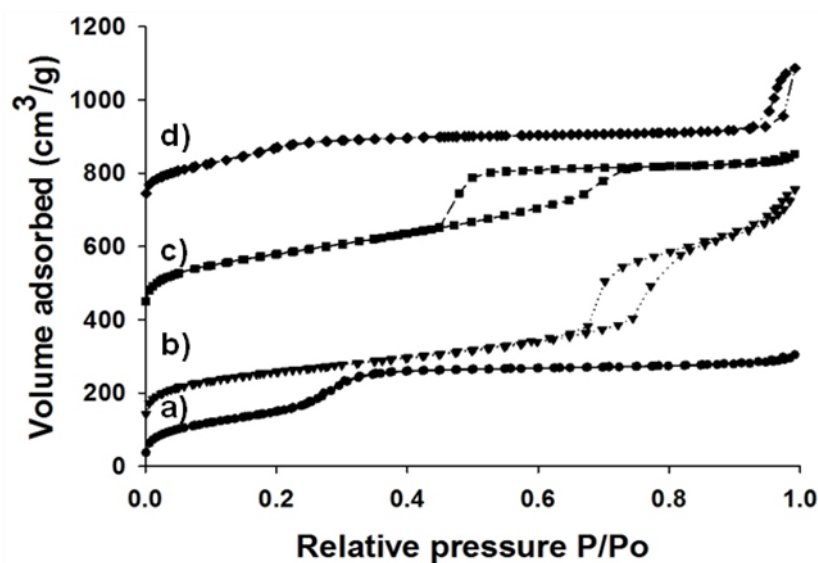

15

**Fig.S2** N<sub>2</sub> adsorption/desorption isotherm of MSNs loaded with imidacloprid a) MCM-41-imi, b) SBA-15-imi, c) IBN-1-imi, d) MCM-48-imi ; (The scale on y-axis is shifted by 70, 350, and 690 cm<sup>3</sup>/g for b, c and d respectively)
